# Supplementary material
Source: publisher site journal article supplement (http://kjim.org/upload/media/kjim-2019-308-suppl3.pdf)
Supplement: Supplementary file 1 [file kjim-2019-308-suppl3.pdf]

**Supplementary Table 3. HRs for the primary composite outcome by Cox regression**

| Variable                | HR        | 95% CI    | p value |
|-------------------------|-----------|-----------|---------|
| Age                     | 1.00      | 0.98–1.02 | 0.876   |
| Female sex              | 0.94      | 0.55–1.60 | 0.823   |
| History of CHD          | 1.71      | 0.96–3.04 | 0.069   |
| Smoking                 | 1.15      | 0.68–1.95 | 0.602   |
| Hypertension            | 0.77      | 0.47–1.26 | 0.295   |
| DM                      | 1.06      | 0.50–2.26 | 0.875   |
| Dyslipidemia            | 1.58      | 0.94–2.65 | 0.082   |
| Definite spasm          | 1.31      | 0.83–2.07 | 0.252   |
| Atherosclerosis > 50%   | 1.50      | 0.75–2.98 | 0.252   |
| Nitrates                | 1.98      | 1.23–3.20 | 0.005   |
| Calcium channel blocker |           |           |         |
| Diltiazem               | Reference |           |         |
| Amlodipine              | 0.49      | 0.18–1.36 | 0.171   |
| Nifedipine              | 1.28      | 0.58–2.81 | 0.542   |
| Benidipine              | 1.01      | 0.31–3.28 | 0.986   |

HR, hazard ratio; CI, confidence interval; CHD, coronary heart disease; DM, diabetes mellitus.
